# Supplementary material
Source: publisher site journal article supplement (https://www.spandidos-publications.com/5301/downloadSupplementary)

Figure S1. Efficiencies of transfections. (A and B) The expression of circRPPH1 was reduced by all three interfering plasmids, particularly sh-circRPPH1#2. (C) The interference of circRPPH1 did not affect the expression of linear RPPH1. (D and E) The overexpression plasmid could efficiently improve the expression level of circRPPH1. (F) The interference of FUS had no effect on the expression of circRPPH1. (G) The expression of FUS was reduced by the transfection of si-FUS. (H, I) The transfection efficiencies of miR-296-5p mimic and inh-296-5p. Data are presented as the mean  $\pm$  SD. \*\* $P < 0.01$  and \*\*\* $P < 0.001$ . circ, circular; OE, overexpression; NC, negative control; miR, microRNA; si-, small interfering.

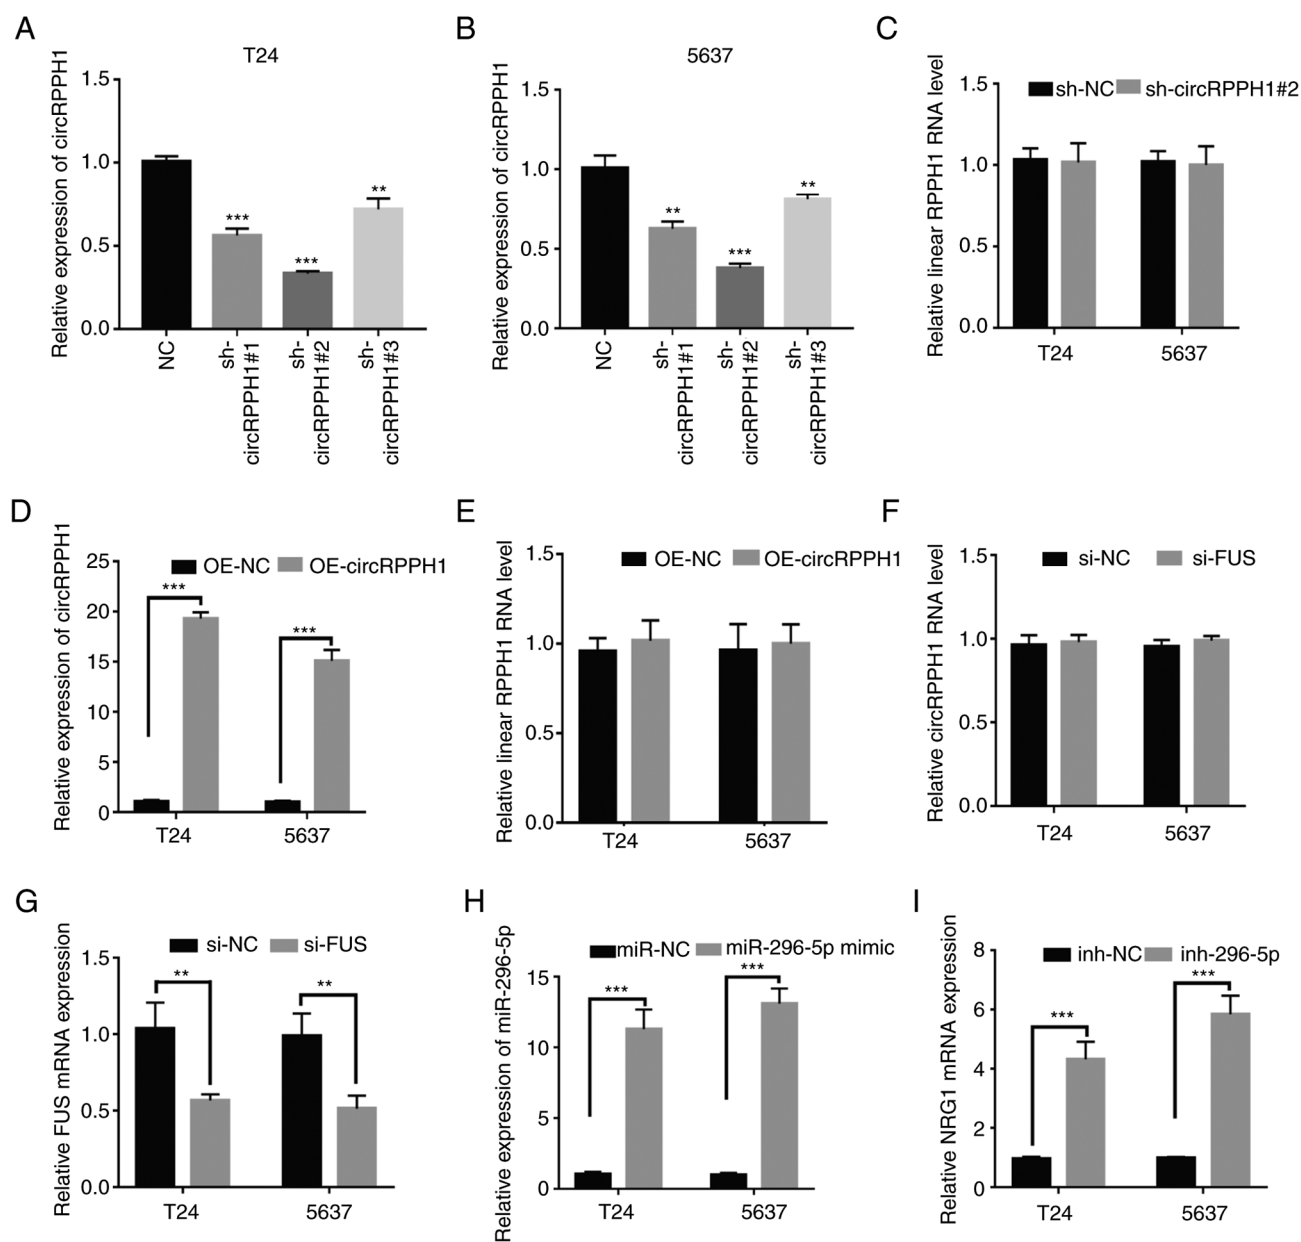

Figure S2. Effect of miR-296-5p and FUS on the malignant activities of BCa cells. (A and B) The suppression of miR-296-5p promoted the malignant behavior traits of BCa cells. (C and D) The interference of FUS could partially reverse the carcinogenic effect of circRPPH1 on the BCa cells. Data are presented as the mean  $\pm$  SD. \*\* $P < 0.01$  and \*\*\* $P < 0.001$ . miR, microRNA; BCa, bladder cancer; OE, overexpression; NC, negative control; inh-, inhibitor.

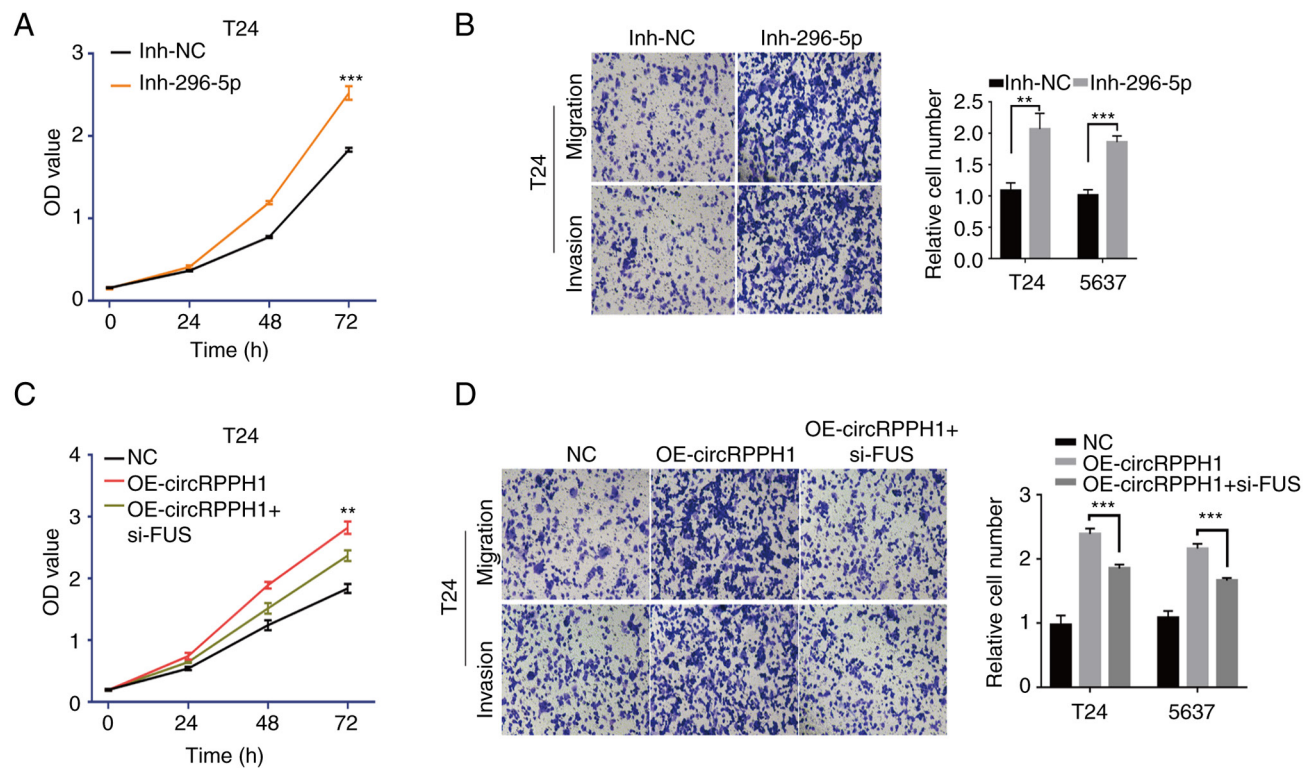

Supplement: Supplementary file 1 [file downloadSupplementary]
